# Supplementary material
Source: publisher figshare collection journal article supplement (https://sage.figshare.com/ndownloader/files/12863240)
Supplement: Supplementary file 1 [file 12863240]

**Online Supplementary Materials, Biggs, et al. “Enhancing peer network interventions for students with complex communication needs.” *Exceptional Children***

Table 1. *Characteristics of Planning Team and Peer Network Members*

|                        | Sex    | Age | Race/ethnicity | Education             | Years known | Years experience |
|------------------------|--------|-----|----------------|-----------------------|-------------|------------------|
| <b>Sara</b>            |        |     |                |                       |             |                  |
| Mother                 | Female | 44  | Hispanic       | High school           | -           | -                |
| *Paraprofessional      | Female | 41  | White          | Associates            | < 1         | 2.5              |
| Special educator       | Female | 30  | White          | Bachelor’s            | < 1         | 5                |
| SLP                    | Female | 32  | White          | Master’s              | 2           | 2                |
| Peer                   | Female | 9   | Black          | 4 <sup>th</sup> grade | 1           | -                |
| Peer                   | Female | 10  | White          | 4 <sup>th</sup> grade | 3           | -                |
| Peer                   | Male   | 9   | White          | 4 <sup>th</sup> grade | 2           | -                |
| <b>Grace</b>           |        |     |                |                       |             |                  |
| Father                 | Male   | 35  | White          | Bachelor’s            | -           | -                |
| *Paraprofessional      | Female | 61  | White          | Bachelor’s            | 1           | 17               |
| Special educator       | Female | 28  | Hispanic       | Master’s              | 2           | 5                |
| SLP                    | Female | 32  | White          | Master’s              | 2           | 2                |
| Peer                   | Female | 8   | White          | 3 <sup>rd</sup> grade | 2           | -                |
| Peer                   | Female | 8   | White          | 3 <sup>rd</sup> grade | 2           | -                |
| Peer                   | Female | 8   | Asian          | 3 <sup>rd</sup> grade | 4           | -                |
| Peer                   | Female | 8   | Hispanic       | 3 <sup>rd</sup> grade | 1           | -                |
| <b>Jeremy</b>          |        |     |                |                       |             |                  |
| Mother                 | Female | 51  | White          | Some college          | -           | -                |
| *Paraprofessional      | Female | 46  | White          | Bachelor’s            | 4           | 5.5              |
| Special educator       | Female | 23  | White          | Bachelor’s            | 1           | 1                |
| SLP                    | Female | 26  | White          | Master’s              | 2           | 3                |
| General educator       | Female | 33  | White          | Master’s              | 1           | 5                |
| Peer                   | Female | 9   | White          | 4 <sup>th</sup> grade | 2           | -                |
| Peer                   | Female | 9   | Black          | 4 <sup>th</sup> grade | < 1         | -                |
| Peer                   | Male   | 10  | White          | 4 <sup>th</sup> grade | 2           | -                |
| <b>Joanna</b>          |        |     |                |                       |             |                  |
| Mother                 | Female | 40  | Hispanic       | Some college          | -           | -                |
| Father                 | Male   | 47  | Hispanic       | Some college          | -           | -                |
| *Paraprofessional      | Female | 62  | Black          | Some college          | 2           | 9                |
| *Sub. paraprofessional | Female | 47  | White/Asian    | Some college          | < 1         | < 1              |
| Special educator       | Female | 30  | White          | Bachelor’s            | < 1         | 5                |
| SLP                    | Female | 27  | White          | Master’s              | < 1         | 3                |
| Peer                   | Female | 9   | White          | 4 <sup>th</sup> grade | 1           | -                |
| Peer                   | Female | 10  | White          | 4 <sup>th</sup> grade | < 1         | -                |
| Peer                   | Female | 10  | Asian          | 4 <sup>th</sup> grade | 4           | -                |

*Note.* \*Denotes intervention facilitator. Education = highest level of education or current grade (for peers); SLP = Speech language pathologist; Years known = number of years the individual had known the focus student prior to the study; Years experience = number of years of experience in current position and similar position.

Table 2. *Procedural Fidelity by Participant and Experimental Phase*

| Fidelity item                                                          | Sara |       |       | Grace |       |       | Jeremy |       |       | Joanna |        |       |
|------------------------------------------------------------------------|------|-------|-------|-------|-------|-------|--------|-------|-------|--------|--------|-------|
|                                                                        | BL   | PN    | PN+M  | BL    | PN    | PN+M  | BL     | PN    | PN+M  | BL     | PN     | PN+M  |
| <b>Intervention fidelity checklist<sup>a</sup></b>                     |      |       |       |       |       |       |        |       |       |        |        |       |
| The student was present for the entire session.                        | –    | 85.7  | 88.9  | –     | 100.0 | 100.0 | –      | 100.0 | 100.0 | –      | 100.0  | 100.0 |
| The AAC device was in proximity the majority of the session.           | –    | 100.0 | 100.0 | –     | 100.0 | 100.0 | –      | 87.5  | 100.0 | –      | 100.0  | 100.0 |
| Materials were provided for a shared activity.                         | –    | 100.0 | 100.0 | –     | 100.0 | 100.0 | –      | 100.0 | 100.0 | –      | 100.0  | 100.0 |
| Peers participated in the shared activity appropriately.               | –    | 100.0 | 100.0 | –     | 100.0 | 100.0 | –      | 100.0 | 100.0 | –      | 100.0  | 100.0 |
| The student participated in the shared activity appropriately.         | –    | 100.0 | 100.0 | –     | 100.0 | 85.7  | –      | 85.7  | 100.0 | –      | 100.0  | 100.0 |
| The facilitator was present during the session.                        | –    | 100.0 | 100.0 | –     | 100.0 | 100.0 | –      | 100.0 | 100.0 | –      | 100.0  | 100.0 |
| The facilitator encouraged interactions using facilitation strategies. | –    | 100.0 | 100.0 | –     | 100.0 | 100.0 | –      | 100.0 | 100.0 | –      | 85.7   | 100.0 |
| The facilitator encouraged students to use interaction strategies.     | –    | 100.0 | 100.0 | –     | 87.5  | 100.0 | –      | 100.0 | 87.5  | –      | 100.0  | 100.0 |
| Peers used at least 10 aided AAC models per 30 minutes.                | –    | (0.0) | 88.9  | –     | (0.0) | 57.1  | –      | (0.0) | 87.5  | –      | (14.3) | 85.7  |
| <b>Peer use of interaction strategies<sup>b</sup></b>                  |      |       |       |       |       |       |        |       |       |        |        |       |
| Ask questions                                                          | 0.0  | 2.0   | 1.9   | 0.4   | 1.5   | 1.9   | 0.6    | 2.0   | 2.0   | 0.1    | 2.0    | 2.0   |
| Use expectant delay                                                    | 0.0  | 2.0   | 1.9   | 0.0   | 1.3   | 1.7   | 0.0    | 1.6   | 1.9   | 0.0    | 1.9    | 2.0   |
| Use encouraging language                                               | 0.0  | 1.6   | 1.4   | 0.1   | 1.4   | 1.3   | 0.3    | 1.3   | 1.9   | 0.0    | 1.7    | 1.7   |
| <b>Peer use of aided AAC modeling strategies<sup>b</sup></b>           |      |       |       |       |       |       |        |       |       |        |        |       |
| “Tell about me”                                                        | 0.0  | (0.0) | 1.6   | 0.0   | (0.1) | 1.7   | 0.0    | (0.0) | 1.1   | 0.0    | (1.0)  | 1.3   |
| “Tell about/ask my friend”                                             | 0.0  | (0.1) | 1.6   | 0.0   | (0.0) | 0.9   | 0.0    | (0.0) | 1.3   | 0.0    | (0.7)  | 1.9   |
| “Respond to what my friend says”                                       | 0.0  | (0.0) | 0.4   | 0.0   | (0.0) | 0.4   | 0.0    | (0.0) | 0.4   | 0.0    | (0.0)  | 0.6   |
| <b>Paraprofessional use of facilitation strategies<sup>c</sup></b>     |      |       |       |       |       |       |        |       |       |        |        |       |
|                                                                        | <1   | 6.7   | 6.9   | <1    | 4.1   | 4.7   | <1     | 6.0   | 6.0   | 0      | 3.3    | 2.4   |

Note. BL = baseline phase; PN = peer network intervention phase; PN+M = peer network with aided AAC modeling intervention phase. The intervention checklist was used only during intervention phases. Numbers in parentheses ( ) indicate implementation was not intended during the respective intervention phase.

<sup>a</sup> Numbers reflect the percentage of sessions fidelity item was observed in the respective intervention phase

<sup>b</sup> Numbers reflect the average observed occurrence using the following scale: 0 = *not observed*, 1 = *sometimes observed* (i.e., < 5 instances), 2 = *frequently observed* (i.e., 5 or more instances)

<sup>c</sup> Numbers reflect number of different facilitation strategies observed (e.g., prompt interaction, praise interaction, find a role in a shared activity for the student or peers)

Table 3. *Social Validity Ratings from Peer Network Members and Facilitators*

| Social validity items                                                                             | Sara  | Grace   | Jeremy | Joanna | <i>M</i> |
|---------------------------------------------------------------------------------------------------|-------|---------|--------|--------|----------|
| Peer network members                                                                              |       |         |        |        |          |
| At first, I was excited to become a peer network member.                                          | 5/5/5 | 5/5/5/3 | 5/5/5  | 5/4/5  | 4.8      |
| I had enough help from an adult during the peer network.                                          | 5/5/4 | 5/5/5/4 | 4/5/4  | 5/5/5  | 4.7      |
| I know how to interact with [student].                                                            | 5/5/5 | 5/3/4/3 | 5/5/4  | 4/4/4  | 4.3      |
| [Student] became better at communicating when I showed him/her words on the communication device. | 5/5/5 | 5/5/4/3 | 5/4/5  | 5/4/4  | 4.5      |
| I enjoyed learning to use the communication device when I talk to [student].                      | 5/5/5 | 5/5/5/5 | 5/5/4  | 5/4/5  | 4.8      |
| Other students in the school should also do this.                                                 | 5/5/5 | 3/5/4/4 | 3/5/4  | 5/4/5  | 4.4      |
| I would be a peer network member again in the future.                                             | 5/5/5 | 5/5/5/5 | 5/5/5  | 4/4/5  | 4.8      |
| Our school should have more peer networks.                                                        | 5/5/5 | 5/5/5/5 | 4/5/4  | 5/4/5  | 4.8      |
| [Student] met new people and/or became better friends because of the network.                     | 5/5/5 | 5/5/5/4 | 5/5/5  | 4/3/5  | 4.7      |
| [Student] is my friend.                                                                           | 5/5/5 | 5/5/5/5 | 5/5/5  | 4/4/5  | 4.8      |
| I would recommend being a peer network member to my other friends.                                | 5/5/4 | 3/5/5/3 | 3/5/5  | 4/4/5  | 4.3      |
| I had fun being a peer network member.                                                            | 5/5/5 | 5/5/5/5 | 5/5/5  | 4/4/5  | 4.8      |
| Peer network facilitators                                                                         |       |         |        |        |          |
| The amount of time required for planning and training was reasonable.                             | 4     | 4       | 4      | 5      | 4.3      |
| I would need ongoing consultation to continue implementing these strategies.                      | 2     | 3       | 3      | 2      | 2.5      |
| Having peers model the communication device helped the student use it more.                       | 4     | 4       | 5      | 3      | 4.0      |
| I could use what I learned to teach others to model the communication device.                     | 4     | 4       | 4      | 4      | 4.0      |
| I am motivated to continue using what I learned in this project.                                  | 3     | 2       | 4      | 4      | 3.3      |
| The peer network intervention fits well within this school.                                       | 4     | 3       | 3      | 3      | 3.3      |
| I would know what to do if asked to implement a peer network again.                               | 4     | 4       | 4      | 4      | 4.0      |
| [Student] has benefitted socially from the peer network intervention.                             | 5     | 4       | 4      | 4      | 4.3      |
| [Student] has more friends and/or got to know friends better.                                     | 4     | 3       | 3      | 3      | 3.3      |
| [Student] became better at communicating through the intervention.                                | 5     | 4       | 3      | 4      | 4.0      |
| The peers without disabilities benefitted socially from being a peer partner.                     | 5     | 4       | 4      | 4      | 4.3      |
| Overall, I enjoyed participating in this project.                                                 | 4     | 3       | 5      | 4      | 4.0      |

*Note.* Data reflect the peer or paraprofessional-facilitator's rating using a 5-point Likert-type scale: 1 = *strongly disagree*, 2 = *disagree*, 3 = *neutral*, 4 = *agree*, 5 = *strongly agree*; *M* = mean across participants

## Supplemental Materials S1. Adherence Checklists for Pre-intervention Planning Meeting, Facilitator Training, and Peer Orientation

### I. Fidelity Checklist for Team Planning meeting

#### Component 1: Introduction and Overview

- Coach provides templates of note-taking sheets for each component of the planning meeting
- Coach provides an overview of agenda for the planning meeting and facilitates introductions of team members
- Coach describes the procedures and steps of the intervention, providing a rationale for the overarching and specific goals of the intervention

#### Component 2: Identifying a Theme and Activities

- Coach facilitates a brainstorming session to identify an overarching theme/ activity to inform the planning of peer network meetings
  - Explains the purpose of the overarching theme/activity and that it should (a) inform the planning of the intervention, (b) be feasible, and (c) be motivating and fun for the student and a group of same age peers
  - Encourages each team member to share input about ideas
  - Guides the team in coming to a decision about one overarching theme/activity
- Coach facilitates the team to record (i.e., write down formally) activities and the materials needed for peer network meetings within this overarching idea

#### Component 3: Identify Target Vocabulary and Discuss Changes to Aided AAC

- Coach provides support for the team to identify and list target vocabulary
  - Explains requirements for selecting target vocabulary
  - Explains the importance of core vocabulary and provides examples
  - Explains the importance of activity-related vocabulary and provides examples
  - Facilitates the team in listing 5-10 activity-related and 5-10 core vocabulary words meeting the requirements
- Coach provides support for the team to discuss changes to vocabulary on the AAC device
  - Team identifies who is responsible for making the changes
  - Team talks about vocabulary and arrangement of vocabulary on the device

### II. Fidelity Checklist for Facilitator Training

#### Component 1: Introduction and Rationale

- Intervention coach provides an overview of agenda for the training and gives the facilitator the printed manual
- Coach reviews the rationale and procedures for the peer network intervention
- Coach reviews the plan for peer network meeting
  - Reviews the overarching activity identified by the planning team, needed materials, and expectations for the facilitator to prepare for each network session
  - Reviews the vocabulary on the AAC device and ensures the programming changes have been made

#### Component 2: Explain Peer Recruitment

- Coach discusses strategies for recruiting peers, and indicates where these materials are found in the printed manual

#### Component 3: Prepare Facilitator to Lead Peer Orientation

- Coach explains the orientation meeting for peers
  - Describes the expectations for the facilitator during the peer orientation
  - Describes the role the intervention coach will play during the peer orientation
  - Carefully explains each of the steps, indicating where the materials are found in the coaching manual
  - Provides an opportunity for the facilitator practice talking through each of the steps, while providing prompting and encouragement
  - Provides opportunity for the facilitator to ask questions about the peer orientation

#### Component 4: Prepare Facilitator to Facilitate Interactions

- Coach explains and models social facilitation strategies to be used during network meetings, and indicates where these materials are found in the printed manual

#### Component 5: Answer Questions

- Coach offers time for discussion/ questions/ describing next steps

**III. Fidelity Checklist for Peer Orientation**

- Facilitator encourages all students to introduce themselves
- Facilitator shares a rationale for the peer network intervention
- Facilitator shares/ supports the focus student in sharing information about the AAC device
  - Demonstrates how the student uses the device to communicate
  - Describes and shows peers vocabulary, including target vocabulary
  - Gives peers opportunity to look at the device/symbols
  - Provides opportunity for peers to ask questions about the AAC device
- Facilitator explains the procedures of the peer network, including:
  - The overarching activity/theme
  - The expectations for peers and the student during the activities
  - When peers should ask for assistance
  - Confidentiality and respectful language
- Facilitator introduces, explains, and gives examples of the three interaction strategies
  - Shows peers the visual cue card for the three strategies
  - Names, explains, and gives examples for “Ask each other questions” (i.e., ask open-ended questions and modify questions as needed by providing choices)
  - Names, explains, and gives examples for “Slow down and give everyone a turn to talk” (i.e., balance communication turns, wait and look at another student to give them time to respond)
  - Names, explains, and gives examples for “Encourage one another” (i.e., offer praise and use positive language)
  - Provides opportunity for peers to ask questions about the interaction strategies
- Facilitator provides prompting, feedback, and reinforcement while students practice using the interaction strategies during a shared activity
- Facilitator offers time for discussion/ questions/ describing next steps
